# Supplementary material for: Boron Tolerance in Aspergillus nidulans Is Sustained by the SltA Pathway Through the SLC-Family Transporters SbtA and SbtB
Source: PubMed Central journal article supplement (PMC5541321; doi:10.3390/genes8070188), 2017-07-21
Supplement: genes-08-00188-s001.pdf [file genes-08-00188-s001.pdf]

Supplementary Material:

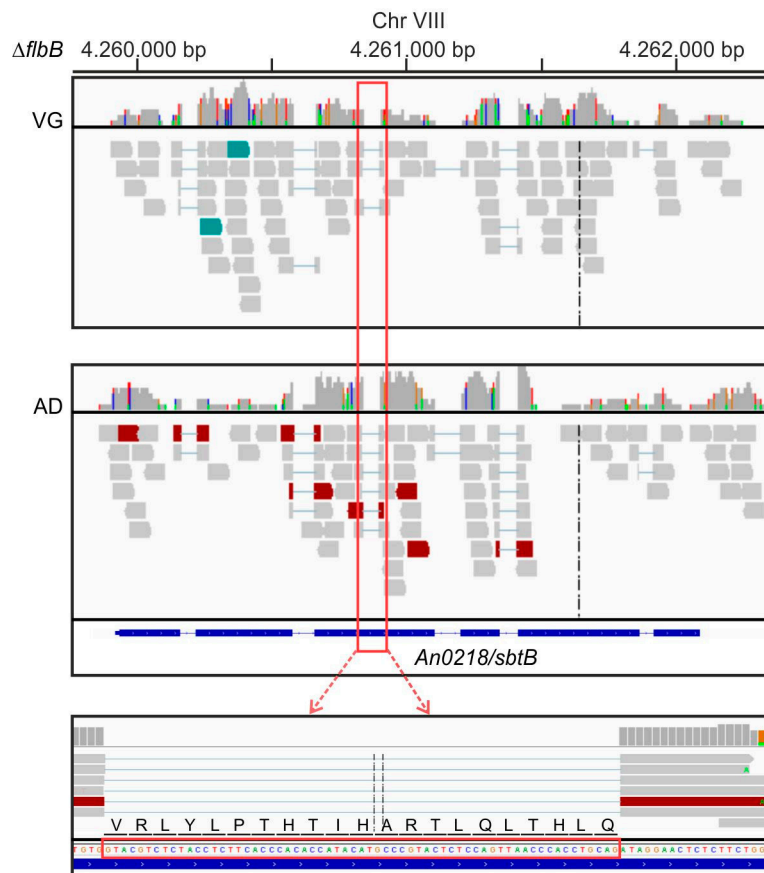

**Figure S1.** RNAseq results for *sbtB/AN0218*. Upper and lower images show mapping of reads corresponding to a  $\Delta flbB$  strain during vegetative growth (VG) or five hours after the induction of asexual development (AD) [1]. IGV (Integrative genomics viewer) software [2] was used. The lower image corresponds to an amplification of the intronic region within exon 3 not predicted by the AspGD database. The sequence of the 21 amino acid-long region that would derive from this intron is also shown.

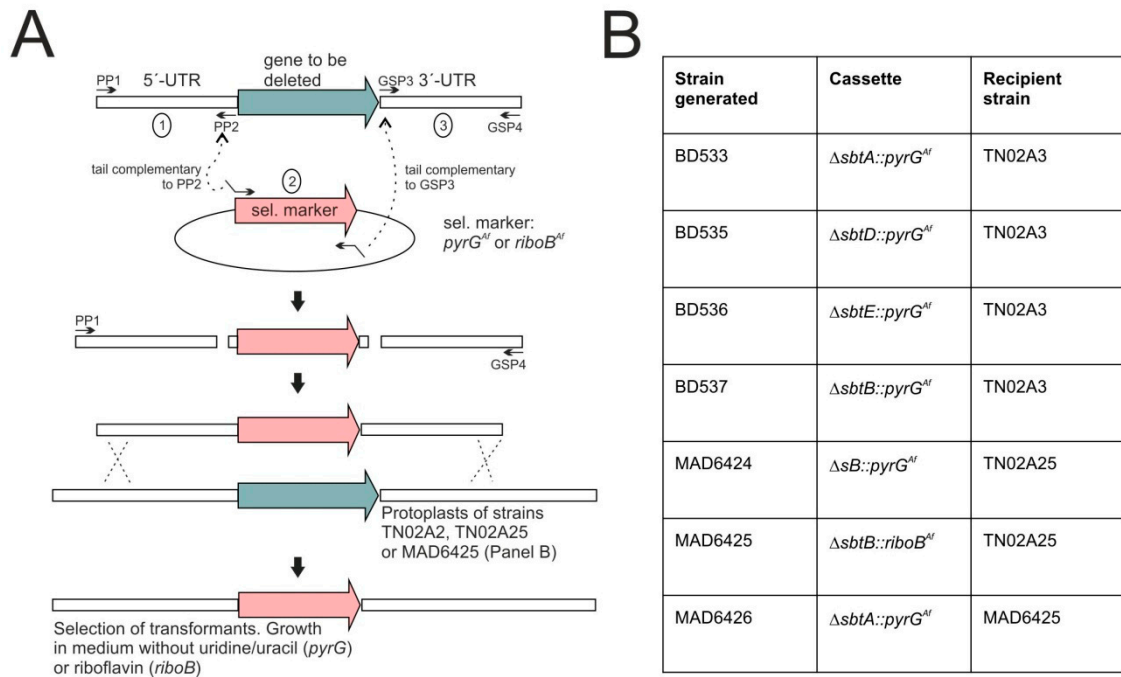

**Figure S2.** Procedure followed for the generation of null mutants of *Aspergillus nidulans*. A) The 5'- and 3'-UTR regions of the targeted gene plus the selection marker were amplified in three independent PCR reactions. In the second PCR reaction, the selection marker (*pyrG<sup>As</sup>* or *riboB<sup>As</sup>*, *pyrG* or *riboB* genes from *A. fumigatus*) incorporated tails complementary, respectively, to the end and beginning of 5'- and 3'-UTR regions. The three fragments were fused in a fourth PCR reaction (fusion-PCR; [3]). The construct was used to transform protoplasts of recipient strains TN02A3, TN02A25 [4] or MAD6425. Selection of transformants was done based on their ability to grow on medium without uridine and uracil (*pyrG<sup>As</sup>* as selection marker) or without riboflavin (*riboB<sup>As</sup>* as selection marker). B) Table showing the strains generated in this work, the fusion-PCR constructs used to generate them and the corresponding recipient strains. See also Table S1.

**Table S1.** Strains used in this work.

| Strain  | Genotype                                                                                                | Reference |
|---------|---------------------------------------------------------------------------------------------------------|-----------|
| BD533   | <i>pyrG89; argB2, ΔsbtA::pyrG<sup>Af</sup>; pyroA4, ΔnkuA::argB</i>                                     | This work |
| BD535   | <i>pyrG89; argB2; pyroA4, ΔnkuA::argB; ΔsbtD::pyrG<sup>Af</sup></i>                                     | This work |
| BD536   | <i>pyrG89; ΔsbtE::pyrG<sup>Af</sup>; argB2; pyroA4, ΔnkuA::argB</i>                                     | This work |
| BD537   | <i>pyrG89; argB2; pyroA4, ΔnkuA::argB; ΔsbtB::pyrG<sup>Af</sup></i>                                     | This work |
| HHF27a  | Prototrophic wild type                                                                                  | [5]       |
| HHF27b  | <i>ΔsltA::riboB<sup>Afum</sup></i>                                                                      | [5]       |
| MAD1685 | <i>inoB2; ΔsltA::riboB<sup>Af</sup></i>                                                                 | [6]       |
| MAD1686 | <i>ΔhalA::pyr4<sup>Nc</sup>; inoB2</i>                                                                  | [6]       |
| MAD2666 | <i>argB2; pyroA4, ΔnkuA::argB</i>                                                                       | [7]       |
| MAD2757 | <i>wA3; ΔhalA::pyr4<sup>Nc</sup>; inoB2; ΔsltA::riboB<sup>Af</sup></i>                                  | [6]       |
| MAD4048 | <i>pyrG89, pabaA1; sltA1</i>                                                                            | [8]       |
| MAD5423 | <i>inoB2; ΔnkuA::BAR?; sltA114; riboB2</i>                                                              | [8]       |
| MAD6424 | <i>pyrG89; argB2; ΔnkuA::argB, pabaB22; ΔsB::pyrG<sup>Af</sup>; riboB2</i>                              | This work |
| MAD6425 | <i>pyrG89; argB2; ΔnkuA::argB, pabaB22; ΔsbtB::riboB<sup>Af</sup>, riboB2</i>                           | This work |
| MAD6426 | <i>pyrG89; argB2, ΔsbtA::pyrG<sup>Af</sup>; ΔnkuA::argB, pabaB22; ΔsbtB::riboB<sup>Af</sup>, riboB2</i> | This work |
| TN02A3  | <i>pyrG89; argB2; pyroA4, ΔnkuA::argB</i>                                                               | [4]       |
| TN02A25 | <i>pyrG89; argB2; ΔnkuA::argB, pabaB22; riboB2</i>                                                      | [4]       |

All strains carry *veA1* mutation. *BAR*, herbicide bialaphos resistance gene from *Streptomyces hygroscopicus*

**Table S2.** Oligonucleotides used in this work.

| Name          | Sequence (5'-3')                                                          | Objective                                                                       |
|---------------|---------------------------------------------------------------------------|---------------------------------------------------------------------------------|
| sbtA-PP1      | GGC CAA CCA GTC CGT CG TAT CG                                             | <i>sbtA</i> promoter                                                            |
| sbtA-PP2      | CAT GTT GAC GCT GCG GTA GTT CGA G                                         | <i>sbtA</i> promoter                                                            |
| sbtA-GSP3     | TAA TCG ACA CGT AGA CGA TGC ACA TCC C                                     | <i>sbtA</i> terminator                                                          |
| sbtA-GSP4     | GGC AAC CCT AGC TTC GAG ATT GAC C                                         | <i>sbtA</i> terminator                                                          |
| sbtA-SMP1     | CTC GAA CTA CCG CAG CGT CAA CAT GAC CGG<br>TCG CCT CAA ACA ATG CTC T      | <i>pyrG<sup>Af</sup></i> SM for <i>sbtA</i> null                                |
| sbtA-GFP2     | GGG ATG TGC ATC GTC TAC GTG TCG ATT AGT<br>CTG AGA GGA GGC ACT GAT GCG    | <i>pyrG<sup>Af</sup></i> SM for <i>sbtA</i> null                                |
| sbtB-PP1_MVP  | TGG GTG TGA TAC TCT ATT TGC G                                             | <i>sbtB</i> promoter                                                            |
| sbtB-PP2      | CAT TGG GGA AGA ATC GAA CAT GGT C                                         | <i>sbtB</i> promoter                                                            |
| sbtB-GSP3     | TGA AAG GAG CAG ACC CTA GGC AGA GG                                        | <i>sbtB</i> terminator                                                          |
| sbtB-GSP4_MVP | TCA CCT GCA ACC ACA GAG C                                                 | <i>sbtB</i> terminator                                                          |
| sbtB-SMP1     | ACC ATG TTC GAT TCT TCC CCA ATG ACC GGT<br>CGC CTC AAA CAA TGC TCT        | <i>pyrG<sup>Af</sup></i> or <i>riboB<sup>Af</sup></i> SMs for <i>sbtB</i> nulls |
| sbtB-GFP2     | CCT CTG CCT AGG GTC TGC TCC TTT CAG TCT GAG<br>AGG AGG CAC TGA TGC G      | <i>pyrG<sup>Af</sup></i> or <i>riboB<sup>Af</sup></i> SMs for <i>sbtB</i> nulls |
| sB-PP1        | GGG GAG GTT GAA GTC GTC GTC GTA ATT G                                     | <i>sB</i> promoter                                                              |
| sB-PP2        | CAT GGT GCG TTG GTG TAA TCC AAA AAC TG                                    | <i>sB</i> promoter                                                              |
| sB-GSP3       | TGA TTG TGA TCT CCC TGG ATG GAG G                                         | <i>sB</i> terminator                                                            |
| sB-GSP4       | CAA GGC TAC GTG AAT GTC GAG TTC CGC                                       | <i>sB</i> terminator                                                            |
| sB-SMP1       | CTG TTT TTG GAT TAC ACC AAC GCA CCA TGA<br>CCG GTC GCC TCA AAC AAT GCT CT | <i>pyrG<sup>Af</sup></i> SM for <i>sB</i> null                                  |
| sB-GFP2       | CCT CCA TCC AGG GAG ATC ACA ATC AGT CTG<br>AGA GGA GGC ACT GAT GCG        | <i>pyrG<sup>Af</sup></i> SM for <i>sB</i> null                                  |
| sbtD-PP1      | CTA GTC AAG ACA TAG AGC GGA GGA GCA ACC                                   | <i>sbtD</i> promoter                                                            |
| sbtD-PP2      | CAT CGT GGC GAG CGG CG                                                    | <i>sbtD</i> promoter                                                            |
| sbtD-GSP3     | TGA GGT GCG GCT TTG GTC AGT C                                             | <i>sbtD</i> terminator                                                          |
| sbtD-GSP4     | CAA GCC CAT ACC ACC TCC TCA ACA CAT C                                     | <i>sbtD</i> terminator                                                          |
| sbtD-SMP1     | CGC CGC TCG CCA CGA TGA CCG GTC GCC TCA<br>AAC AAT GCT CT                 | <i>pyrG<sup>Af</sup></i> SM for <i>sbtD</i> null                                |
| sbtD-GFP2     | GAC TGA CCA AAG CCG CAC CTC AGT CTG AGA<br>GGA GGC ACT GAT GCG            | <i>pyrG<sup>Af</sup></i> SM for <i>sbtD</i> null                                |
| sbtE-PP1      | GTA CCA AAC CGA GCT TGT CCG                                               | <i>sbtE</i> promoter                                                            |
| sbtE-PP2      | CAT AGC TGT CTA GGC ACG AAT AGA AGG GG                                    | <i>sbtE</i> promoter                                                            |
| sbtE-GSP3     | TGA GTC CTT CCC ACC ACC ACC                                               | <i>sbtE</i> terminator                                                          |
| sbtE-GSP4     | GCG GGC TTA AAT AGG CGT TGC TG                                            | <i>sbtE</i> terminator                                                          |
| sbtE-SMP1     | CCC CTT CTA TTC GTG CCT AGA CAG CTA TGA<br>CCG GTC GCC TCA AAC AAT GCT CT | <i>pyrG<sup>Af</sup></i> SM for <i>sbtE</i> null                                |
| sbtE-GFP2     | GGT GGT GGT GGG AAG GAC TCA GTC TGA GAG<br>GAG GCA CTG ATG CG             | <i>pyrG<sup>Af</sup></i> SM for <i>sbtE</i> null                                |
| sbtA-exon 1   | TCG TTG CAG GAA TCC TAG GC                                                | <i>sbtA</i> probe-Northern blot                                                 |
| sbtA-exon 2   | CTC TGA TTT CCC ATG TTC TTC C                                             | <i>sbtA</i> probe-Northern blot                                                 |
| sbtB-exon 1   | AAG CGA CGT CTG TGA CGG AGC                                               | <i>sbtB</i> probe-Northern blot                                                 |
| sbtB-exon 2   | ACC TAG ACT CTC CAT TAC GG                                                | <i>sbtB</i> probe-Northern blot                                                 |
| Pho89-exon1   | CAC AAC GCA GAG TAT CAT TGG                                               | <i>AN8956</i> probe-Northern blot                                               |
| Pho89-exon2   | TAA CGA GGA ACC ACA CTG G                                                 | <i>AN8956</i> probe-Northern blot                                               |
| EnaA-fw 1     | TCA ACG TCG GAA CAC CTC TT                                                | <i>enaA</i> probe-Northern blot                                                 |
| EnaA-rev 2    | TTG ACA CCG TCA CCA GTC AT                                                | <i>enaA</i> probe-Northern blot                                                 |

SM, selectable marker.

**Table S3.** Orthologs of SbtA, SbtB, SB, SbtD and SbtE in filamentous fungal species, yeast and higher eukaryotes.

| Species                              | SbtA                                           | SbtB                                                   | SB                                       | SbtD                                                 | SbtE                                      |
|--------------------------------------|------------------------------------------------|--------------------------------------------------------|------------------------------------------|------------------------------------------------------|-------------------------------------------|
| <i>Aspergillus nidulans</i>          | An4904<br>L: 667                               | An0218<br>L: 573                                       | An2730<br>L: 827                         | An3157<br>L: 755                                     | An3665<br>L: 1060                         |
| <i>Aspergillus terreus</i>           | ATEG_4612<br>L:645<br>Sc:988<br>E:0.0          | ATEG_05282<br>L:583<br>Sc:869<br>E:0.0                 | ATEG_02570<br>L:841<br>Sc:1312<br>E:0.0  | ATEG_04052<br>L:757<br>Sc:1056<br>E:0.0              | ATEG_03129<br>L:1098<br>Sc:1473<br>E:0.0  |
| <i>Aspergillus fumigatus</i>         | Y699_01463<br>L:679<br>Sc:975<br>E:0.0         | Y699_06302<br>L:585<br>Sc:853<br>E:0.0                 | Y699_06792<br>L:847<br>Sc:1299<br>E:0.0  | Y699_01217<br>L:733<br>Sc:956<br>E:0.0               | Y699_04898<br>L:1070<br>Sc:1464<br>E:0.0  |
| <i>Aspergillus niger</i>             | An02g06580<br>L:671<br>Sc:968<br>E:0.0         | An01g01790<br>L:543<br>Sc:861<br>E:0.0                 | An15g04600<br>L:809<br>Sc:1040<br>E:0.0  | An02g09350<br>L:730<br>Sc:985<br>E:0.0               | An01g07860<br>L:1066<br>Sc:1498<br>E:0.0  |
| <i>Penicillium italicum italicum</i> | PITC_012880<br>L:630<br>Sc:955<br>E:0.0        | PITC_022700<br>L:592<br>Sc:805<br>E:0.0                | PITC_019010<br>L:835<br>Sc:986<br>E:0.0  | PITC_061370<br>L:772<br>Sc:933<br>E:0.0              | PITC_067670<br>L:1057<br>Sc:1371<br>E:0.0 |
| <i>Coccidioides immitis</i>          | CIMG_13744<br>L:663<br>Sc:945<br>E:0.0         | CIMG_02924<br>L:595<br>Sc:771<br>E:0.0                 | CIMG_04891<br>L:825<br>Sc:1072<br>E:0.0  | CIMG_00108<br>L:723<br>Sc:845<br>E:0.0               | CIMG_07040<br>L:1084<br>Sc:1119<br>E:0.0  |
| <i>Talaromyces stipitatus</i>        | <b>TSTA_032150</b><br>L:691<br>Sc:928<br>E:0.0 | <b>TSTA_032150</b><br>L:691<br>Sc:492<br>E:2e-165      | TSTA_019080<br>L:833<br>Sc:1081<br>E:0.0 | TSTA_029710<br>L:782<br>Sc:846<br>E:0.0              | TSTA_076660<br>L:1094<br>Sc:1272<br>E:0.0 |
| <i>Neurospora crassa</i>             | <b>NCU01480</b><br>L:618<br>Sc:774<br>E:0.0    | <b>NCU01480</b><br>L:618<br>Sc:476<br>E: 4e-160        | NCU03235<br>L:916<br>Sc:928<br>E:0.0     | NCU09642<br>L:799<br>Sc:737<br>E:0.0                 | NCU02632<br>L:1118<br>Sc:900<br>E:0.0     |
| <i>Fusarium oxysporum</i>            | FOYG_02892<br>L:609<br>Sc:771<br>E:0.0         | FOYG_17224<br>L:602<br>Sc:787<br>E:0.0                 | FOYG_00665<br>L:787<br>Sc:920<br>E:0.0   | FOYG_12381<br>L:801<br>Sc:758<br>E:0.0               | FOYG_06967<br>L:1082<br>Sc:915<br>E:0.0   |
| <i>Magnaporthe oryzae</i>            | <b>MGG_15203</b><br>L:701<br>Sc:770<br>E:0.0   | <b>MGG_15203</b><br>L:701<br>Sc:465<br>E:1e-154        | MGG_04640<br>L:844<br>Sc:940<br>E:0.0    | MGG_09838<br>L:800<br>Sc:752<br>E:0.0                | MGG_04433<br>L:1103<br>Sc:923<br>E:0.0    |
| <i>Saccharomyces cerevisiae</i>      | <b>Bor 1</b><br>L:576<br>Sc:451<br>E:7e-151    | <b>Bor 1</b><br>L:576<br>Sc:363<br>E:5e-118            | Sul1<br>L:859<br>Sc:526<br>E:1e-172      | YPR003C<br>L:754<br>Sc:414<br>E:3e-133               | YGR125W<br>L:1036<br>Sc:644<br>E:0.0      |
| <i>Homo sapiens</i>                  | SCL4A1<br>L:911<br>Sc:197<br>E:2e-52           | SCL4A3-Isoform<br>CAE3<br>L:936<br>Sc:167<br>E:8.0e-43 | SLC26A11<br>L:606<br>Sc:248<br>E:1e-70   | SLC26A6-Isoform<br>6<br>L:671<br>Sc:169.1<br>E:2e-43 | -----                                     |
| <i>Arabidopsis thaliana</i>          | At4g32510<br>L:675<br>Sc:180<br>E:2e-48        | BOR2<br>L:703<br>Sc:170<br>E:3e-45                     | SULTR3;1<br>L:703<br>Sc:213<br>E:1e-58   | SULTR3;3<br>L:631<br>Sc:207<br>E:1e-57               | SULTR3;5<br>L:634<br>Sc:57.0<br>E:7e-08   |

L: Length; Sc: Score; E: E value. Yellow background indicates a common ortholog for both *sbtA* and *sbtB* in that genome.

1. Oiartzabal-Arano, E.; Garzia, A.; Gorostidi, A.; Ugalde, U.; Espeso, E. A.; Etxebeste, O. Beyond asexual development: Modifications in the gene expression profile caused by the absence of the *Aspergillus nidulans* transcription factor FlbB. *Genetics* **2015**, *199*, 1127–42.
2. Robinson, J. T.; Thorvaldsdóttir, H.; Winckler, W.; Guttman, M.; Lander, E. S.; Getz, G.; Mesirov, J. P. Integrative genomics viewer. *Nat. Biotechnol.* **2011**, *29*, 24–26.
3. Yang, L.; Ukil, L.; Osmani, A.; Nahm, F.; Davies, J.; De Souza, C. P. C.; Dou, X.; Perez-Balaguer, A.; Osmani, S. A. Rapid production of gene replacement constructs and generation of a green fluorescent protein-tagged centromeric marker in *Aspergillus nidulans*. *Eukaryot. Cell* **2004**, *3*, 1359–62.
4. Nayak, T.; Szweczyk, E.; Oakley, C. E.; Osmani, A.; Ukil, L.; Murray, S. L.; Hynes, M. J.; Osmani, S. A.; Oakley, B. R. A versatile and efficient gene-targeting system for *Aspergillus nidulans*. *Genetics* **2006**, *172*, 1557–66.
5. Findon, H.; Calcagno-Pizarelli, A.-M.; Martínez, J. L.; Spielvogel, A.; Markina-Iñarrairaegui, A.; Indrakumar, T.; Ramos, J.; Peñalva, M. A.; Espeso, E. A.; Arst, H. N. Analysis of a novel calcium auxotrophy in *Aspergillus nidulans*. *Fungal Genet. Biol.* **2010**, *47*, 647–655.
6. Mellado, L.; Calcagno-Pizarelli, A. M.; Lockington, R. A.; Cortese, M. S.; Kelly, J. M.; Arst, H. N.; Espeso, E. A. A second component of the SltA-dependent cation tolerance pathway in *Aspergillus nidulans*. *Fungal Genet. Biol.* **2015**, *82*, 116–128.
7. Garzia, A.; Etxebeste, O.; Rodríguez-Romero, J.; Fischer, R.; Espeso, E. A.; Ugalde, U. Transcriptional changes in the transition from vegetative cells to asexual development in the model fungus *Aspergillus nidulans*. *Eukaryot. Cell* **2013**, *12*, 311–321.
8. Mellado, L.; Arst, H. N.; Espeso, E. A. Proteolytic activation of both components of the cation stress-responsive Slt pathway in *Aspergillus nidulans*. *Mol. Biol. Cell* **2016**, *27*, 2598–612.
